# Supplementary material for: DNA methylation of METTL7A gene body regulates its transcriptional level in thyroid cancer
Source: PubMed Central journal article supplement (PMC5470999; doi:10.18632/oncotarget.16147), 2017-03-13
Supplement: oncotarget-08-34652-s001.pdf [file oncotarget-08-34652-s001.pdf]

# DNA methylation of METTL7A gene body regulates its transcriptional level in thyroid cancer

## SUPPLEMENTARY FIGURES

Methylation level of endogenous METTL7A in BCPAP and TCP-1

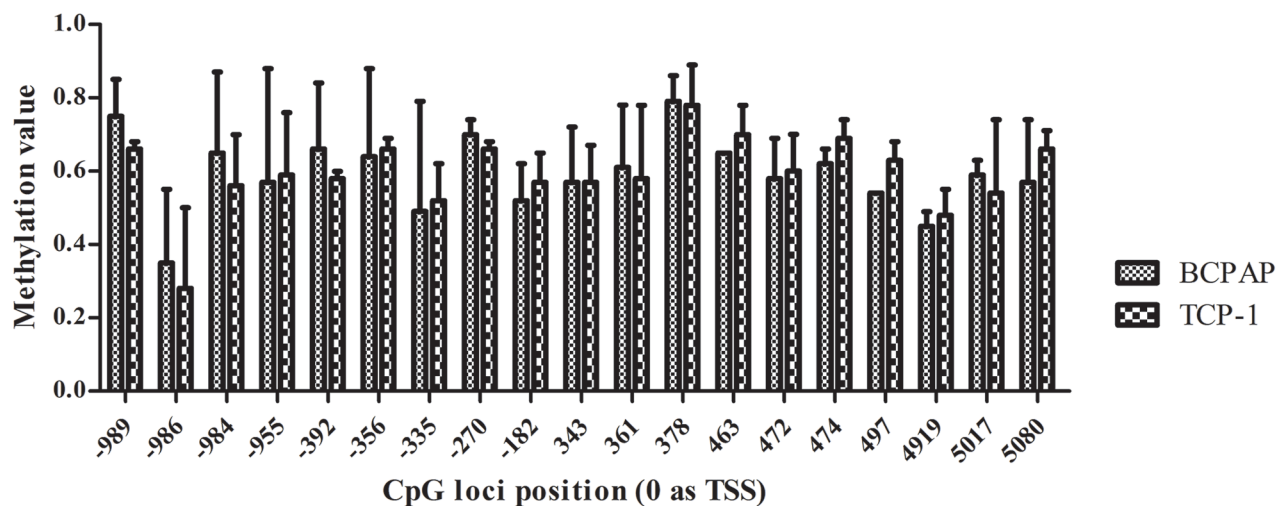

Supplementary Figure 1: Methylation level of endogenous genomic METTL7A in BCPAP and TPC-1 cell lines. The data of METTL7A in two cell lines is normalized by methylation level of LINE-1, which is thought as a stable methylated region and can represent the overall methylation level of genomic DNA.

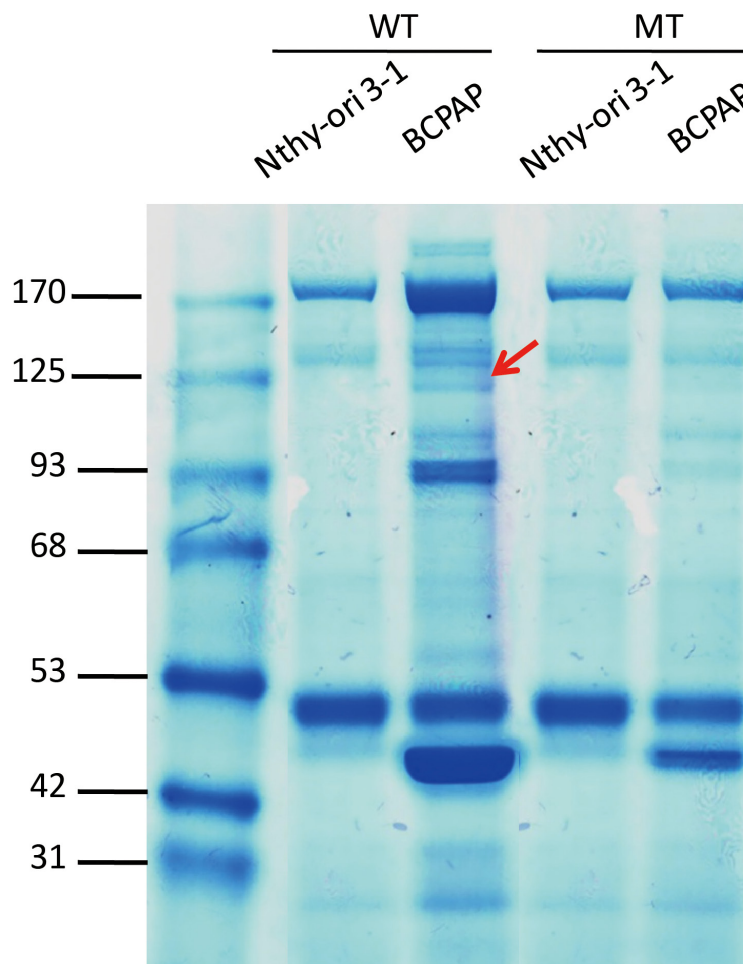

Supplementary Figure 2: The blue staining of the protein patterns of wild type and mutant METTL7A template in Nthy-ori 3-1 and BCPAP cells.
